# Supplementary material for: Association of inflammatory markers with all-cause mortality and cardiovascular mortality in postmenopausal women with osteoporosis or osteopenia
Source: PubMed Central journal article supplement (PMC10500848; doi:10.1186/s12905-023-02631-6), 2023-09-14
Supplement: 12905_2023_2631_MOESM2_ESM.pdf [file 12905_2023_2631_MOESM2_ESM.pdf]

CVD-mortality

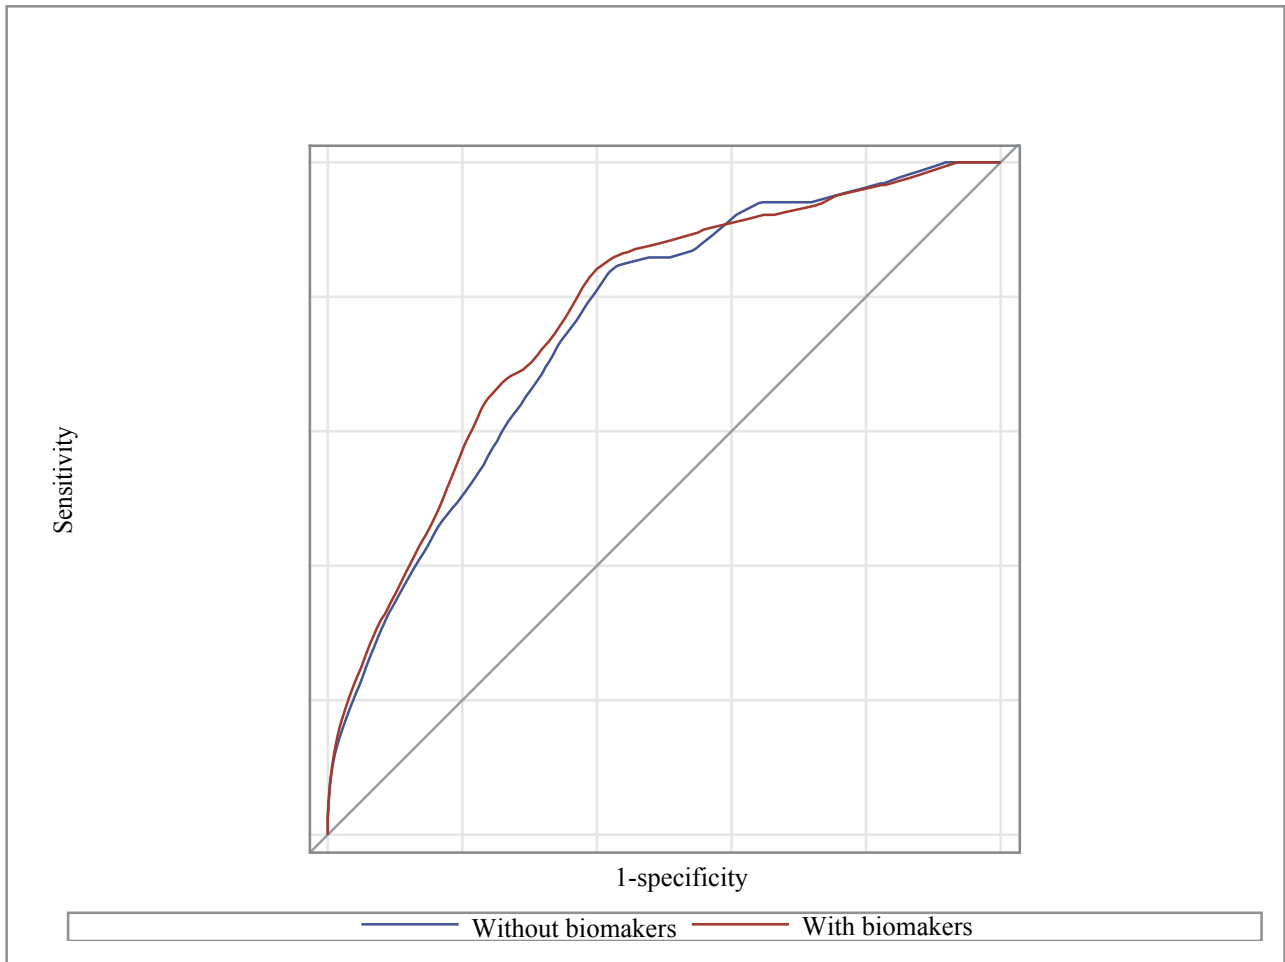

Supplementary Figure 2. ROC for comparing performance with and without biomarkers in CVD mortality.
